# Supplementary material for: Volcanogenic CO2 Degassing in the Songliao Continental Rift System, NE China
Source: Hindawi journal article supplement (doi:10.1155/2019/8053579), 2019-08-19
Supplement: f1 [file 8053579.f1.pdf]

1 [Supplementary materials for:](#)

2

3 **Volcanogenic CO<sub>2</sub> degassing in the Songliao continental rift system, NE China**

4 Wenbin Zhao <sup>1,2,3</sup>, Zhengfu Guo <sup>1,2,3\*</sup>, Ming Lei <sup>1,2,3</sup>, Maoliang Zhang <sup>1,2,3</sup>, Lin Ma <sup>1,2,3</sup>, Danielle Fortin <sup>4</sup>,  
5 Guodong Zheng <sup>5,6</sup>

6

7 **1.** Key Laboratory of Cenozoic Geology and Environment, Institute of Geology and Geophysics, Chinese  
8 Academy of Sciences, Beijing 100029, China;

9 **2.** CAS Center for Excellence in Life and Paleoenvironment, Beijing, 100044, China;

10 **3.** College of Earth and Planetary Sciences, University of Chinese Academy of Sciences, Beijing 100049,  
11 China;

12 **4.** Department of Earth and Environmental Sciences, University of Ottawa, Ottawa, Ontario, K1N 6N5, Canada;

13 **5.** Northwest Institute of Eco-Environment and Resources, Chinese Academy of Sciences, Lanzhou 730000,  
14 China;

15 **6.** Key Laboratory of Petroleum Resources, Gansu Province, Lanzhou 730000, China

16

17

---

18 **Contents**

19 [Supplementary Table S1 and S2](#): Measured soil CO<sub>2</sub> fluxes of the whole WMVF (S1) and SE slope of the Laoheishan  
20 volcanic cone (S2).

21 [Supplementary Table S3](#): Chemical and C-He isotopic compositions of spring gases in WMVF.

22 [Supplementary Table S4](#): Reference values for associated parameters used in C-He isotope coupling systematics.

23 [Supplementary Table S5 and S6](#): Results of the C-He isotope coupling calculation of WMVF volatiles (stage 1, S5;  
24 stage 2, S6).

25 [Supplementary Table S7 and S8](#): Reference values for associated parameters used in Nd-Mg isotope coupling model  
26 (S7) and results of the isotope coupling calculation (S8).

27 [Supplementary Fig. S1](#): Nd-Mg isotope coupling model for the Cenozoic basalts in NE China.

28

---

29 **Supplementary Table S1** Measured soil CO<sub>2</sub> fluxes (g m<sup>-2</sup> d<sup>-1</sup>) of whole Wudalianchi monogenetic volcanic field,  
 30 NE China.

| Points | Latitude (N) | Longitude (E) | Slope  | φ (g m <sup>-2</sup> d <sup>-1</sup> ) | Soil Temperature (°C) |
|--------|--------------|---------------|--------|----------------------------------------|-----------------------|
| 1      | 48.6366      | 126.1071      | 0.154  | 1.81                                   | 22.8                  |
| 2      | 48.6531      | 126.0634      | 4.078  | 47.83                                  | 21.2                  |
| 3      | 48.6559      | 126.0556      | 0.837  | 9.82                                   | 21.7                  |
| 4      | 48.7228      | 126.0296      | 0.501  | 5.88                                   | 23.3                  |
| 5      | 48.7375      | 126.0467      | 0.654  | 7.67                                   | 23.0                  |
| 6      | 48.7881      | 126.2606      | 0.799  | 9.37                                   | 27.3                  |
| 7      | 48.7090      | 126.1256      | 0.351  | 4.12                                   | 22.5                  |
| 8      | 48.7100      | 126.1233      | 0.253  | 2.97                                   | 27.0                  |
| 9      | 48.7160      | 126.1273      | 0.800  | 9.38                                   | 22.3                  |
| 10     | 48.7175      | 126.1270      | 0.580  | 6.80                                   | 20.1                  |
| 11     | 48.7187      | 126.1246      | 1.445  | 16.94                                  | 18.1                  |
| 12     | 48.7206      | 126.1237      | 1.375  | 16.13                                  | 18.2                  |
| 13     | 48.7219      | 126.1203      | 0.953  | 11.18                                  | 22.8                  |
| 14     | 48.6523      | 126.1339      | 1.420  | 16.66                                  | 25.0                  |
| 15     | 48.6527      | 126.1342      | 5.611  | 65.82                                  | 24.3                  |
| 16     | 48.6532      | 126.1358      | 1.137  | 13.34                                  | 23.3                  |
| 17     | 48.6528      | 126.1347      | 10.859 | 127.38                                 | 23.0                  |
| 18     | 48.6526      | 126.1341      | 5.498  | 64.49                                  | 28.7                  |
| 19     | 48.6517      | 126.1329      | 1.975  | 23.16                                  | 23.3                  |
| 20     | 48.6513      | 126.1323      | 1.879  | 22.05                                  | 28.5                  |
| 21     | 48.6510      | 126.1313      | 0.299  | 3.51                                   | 27.0                  |
| 22     | 48.6593      | 126.1293      | 2.770  | 32.49                                  | 29.8                  |
| 23     | 48.6575      | 126.1268      | 0.268  | 3.15                                   | 27.9                  |
| 24     | 48.6732      | 126.1225      | 0.305  | 3.58                                   | 27.9                  |
| 25     | 48.6668      | 126.1250      | 4.346  | 50.98                                  | 28.7                  |
| 26     | 48.6670      | 126.1262      | 7.203  | 84.50                                  | 32.3                  |
| 27     | 48.6674      | 126.1275      | 6.471  | 75.91                                  | 33.0                  |
| 28     | 48.6682      | 126.1300      | 2.842  | 33.34                                  | 33.3                  |
| 29     | 48.6781      | 126.1161      | 0.291  | 3.42                                   | 29.6                  |
| 30     | 48.6784      | 126.1251      | 2.494  | 29.26                                  | 30.5                  |
| 31     | 48.6770      | 126.1258      | 1.733  | 20.33                                  | 31.7                  |
| 32     | 48.6831      | 126.1128      | 2.597  | 30.47                                  | 27.7                  |
| 33     | 48.6862      | 126.1032      | 2.824  | 33.12                                  | 30.3                  |
| 34     | 48.6837      | 126.0986      | 6.518  | 76.45                                  | 22.5                  |
| 35     | 48.6814      | 126.0910      | 0.852  | 10.00                                  | 29.4                  |
| 36     | 48.6809      | 126.0888      | 6.835  | 80.18                                  | 23.3                  |
| 37     | 48.6906      | 126.0911      | 2.282  | 26.77                                  | 26.8                  |
| 38     | 48.6930      | 126.0828      | 0.367  | 4.31                                   | 29.7                  |
| 39     | 48.7010      | 126.0605      | 2.032  | 23.84                                  | 29.8                  |
| 40     | 48.7002      | 126.0607      | 7.926  | 92.97                                  | 30.1                  |

---

|    |         |          |        |        |      |
|----|---------|----------|--------|--------|------|
| 41 | 48.6995 | 126.0606 | 0.485  | 5.69   | 29.9 |
| 42 | 48.6705 | 126.1131 | 1.483  | 17.39  | 31.1 |
| 43 | 48.6534 | 126.1364 | 13.769 | 161.50 | 23.5 |
| 44 | 48.6382 | 126.1039 | 0.626  | 7.34   | 26.4 |
| 45 | 48.6410 | 126.0964 | 4.887  | 57.33  | 25.7 |
| 46 | 48.6449 | 126.0878 | 0.448  | 5.25   | 28.5 |
| 47 | 48.6478 | 126.0797 | 0.202  | 2.37   | 28.5 |
| 48 | 48.6572 | 126.1349 | 1.177  | 13.81  | 22.8 |
| 49 | 48.6575 | 126.1194 | 0.410  | 4.80   | 21.5 |
| 50 | 48.6595 | 126.1322 | 1.032  | 12.11  | 18.8 |
| 51 | 48.6567 | 126.1151 | 0.242  | 2.83   | 20.7 |
| 52 | 48.6624 | 126.1100 | 0.187  | 2.20   | 20.4 |
| 53 | 48.6321 | 126.1719 | 0.342  | 4.01   | 19.5 |
| 54 | 48.6403 | 126.1670 | 0.232  | 2.73   | 18.7 |
| 55 | 48.6362 | 126.1484 | 0.417  | 4.89   | 18.4 |
| 56 | 48.6301 | 126.1448 | 0.476  | 5.59   | 19.2 |
| 57 | 48.6309 | 126.1530 | 0.202  | 2.37   | 20.5 |
| 58 | 48.6386 | 126.1330 | 0.349  | 4.09   | 20.8 |
| 59 | 48.6373 | 126.1342 | 0.681  | 7.99   | 18.8 |
| 60 | 48.6514 | 126.0751 | 0.220  | 2.58   | 20.8 |
| 61 | 48.6617 | 126.0312 | 0.176  | 2.06   | 21.5 |
| 62 | 48.6777 | 126.0158 | 0.534  | 6.26   | 22.5 |
| 63 | 48.6810 | 126.0327 | 0.413  | 4.85   | 22.8 |
| 64 | 48.7009 | 126.0087 | 0.231  | 2.71   | 21.8 |
| 65 | 48.7443 | 125.9928 | 0.214  | 2.51   | 19.6 |
| 66 | 48.7229 | 126.0188 | 0.959  | 11.25  | 23.2 |
| 67 | 48.7584 | 126.0647 | 0.242  | 2.83   | 22.8 |
| 68 | 48.7063 | 126.0403 | 0.262  | 3.07   | 23.6 |
| 69 | 48.6601 | 126.1700 | 0.162  | 1.90   | 25.6 |
| 70 | 48.6703 | 126.1947 | 0.220  | 2.58   | 19.8 |
| 71 | 48.6933 | 126.2130 | 0.412  | 4.83   | 21.2 |
| 72 | 48.6964 | 126.2271 | 0.268  | 3.14   | 22.5 |
| 73 | 48.7025 | 126.2263 | 0.417  | 4.89   | 25.3 |
| 74 | 48.7156 | 126.2345 | 3.672  | 43.07  | 23.6 |
| 75 | 48.7363 | 126.2371 | 0.500  | 5.87   | 23.4 |
| 76 | 48.7878 | 126.2482 | 0.382  | 4.48   | 21.6 |
| 77 | 48.6999 | 126.2564 | 0.419  | 4.91   | 23.2 |
| 78 | 48.6879 | 126.2856 | 0.995  | 11.67  | 24.1 |
| 79 | 48.6817 | 126.3084 | 0.284  | 3.33   | 23.5 |
| 80 | 48.6487 | 126.1388 | 0.315  | 3.69   | 24.5 |
| 81 | 48.6502 | 126.1374 | 0.341  | 4.00   | 22.1 |
| 82 | 48.6498 | 126.1362 | 0.451  | 5.29   | 23.2 |
| 83 | 48.6497 | 126.1344 | 0.310  | 3.64   | 22.8 |
| 84 | 48.6641 | 126.3222 | 0.325  | 3.81   | 23.8 |

---

|    |         |          |       |       |      |
|----|---------|----------|-------|-------|------|
| 85 | 48.6587 | 126.3297 | 0.297 | 3.49  | 25.5 |
| 86 | 48.7366 | 126.1589 | 1.734 | 20.37 | 20.2 |
| 87 | 48.7125 | 126.1295 | 0.280 | 7.96  | 25.6 |
| 88 | 48.7129 | 126.1289 | 0.175 | 4.88  | 17.5 |
| 89 | 48.7127 | 126.1287 | 0.096 | 2.69  | 22.8 |
| 90 | 48.7124 | 126.1287 | 0.166 | 4.62  | 18.6 |
| 91 | 48.7174 | 126.1398 | 0.385 | 10.85 | 26.6 |
| 92 | 48.7163 | 126.1409 | 0.304 | 8.36  | 25.0 |

31

32

33 **Supplementary Table S2** Measured soil CO<sub>2</sub> fluxes (g m<sup>-2</sup> d<sup>-1</sup>) of SE slope of the Laoheishan volcanic cone.

| Points | Latitude (N) | Longitude (E) | φ (g m <sup>-2</sup> d <sup>-1</sup> ) |
|--------|--------------|---------------|----------------------------------------|
| W1     | 48.7101      | 126.1185      | 3.82                                   |
| W2     | 48.7099      | 126.1186      | 2.50                                   |
| W3     | 48.7096      | 126.1187      | 29.96                                  |
| W4     | 48.7094      | 126.1188      | 4.37                                   |
| W5     | 48.7103      | 126.1209      | 11.68                                  |
| W6     | 48.7090      | 126.1199      | 12.18                                  |
| W7     | 48.7096      | 126.1231      | 6.34                                   |
| W8     | 48.7095      | 126.1237      | 17.90                                  |
| W9     | 48.7099      | 126.1233      | 1.49                                   |
| W10    | 48.7100      | 126.1231      | 4.66                                   |
| W11    | 48.7100      | 126.1226      | 3.14                                   |
| W12    | 48.7108      | 126.1226      | 54.06                                  |
| W13    | 48.7107      | 126.1225      | 92.24                                  |
| W14    | 48.7101      | 126.1221      | 11.77                                  |
| W15    | 48.7092      | 126.1202      | 11.79                                  |
| W16    | 48.7096      | 126.1201      | 4.17                                   |
| W17    | 48.7099      | 126.1200      | 3.72                                   |
| W18    | 48.7100      | 126.1211      | 3.11                                   |
| W19    | 48.7104      | 126.1210      | 24.30                                  |
| W20    | 48.7106      | 126.1209      | 6.46                                   |
| W21    | 48.7107      | 126.1206      | 13.19                                  |
| W22    | 48.7108      | 126.1208      | 7.56                                   |
| W23    | 48.7109      | 126.1209      | 42.93                                  |
| W24    | 48.7110      | 126.1210      | 7.18                                   |
| W25    | 48.7109      | 126.1212      | 12.64                                  |
| W26    | 48.7111      | 126.1212      | 5.69                                   |
| W27    | 48.7112      | 126.1210      | 10.18                                  |
| W28    | 48.7113      | 126.1208      | 11.92                                  |
| W29    | 48.7111      | 126.1204      | 9.28                                   |
| W30    | 48.7109      | 126.1202      | 11.67                                  |

|     |         |          |       |
|-----|---------|----------|-------|
| W31 | 48.7107 | 126.1203 | 5.83  |
| W32 | 48.7107 | 126.1233 | 31.62 |
| W33 | 48.7097 | 126.1218 | 3.01  |
| W34 | 48.7108 | 126.1186 | 7.96  |
| W35 | 48.7105 | 126.1188 | 4.88  |
| W36 | 48.7091 | 126.1226 | 2.69  |
| W37 | 48.7093 | 126.1211 | 4.62  |
| W38 | 48.7105 | 126.1196 | 6.31  |

34

35

36

**Supplementary Table S3** Chemical and C-He isotope compositions of spring gases in WMVF

| Sample No.                            | T (°C) | N <sub>2</sub> (%) | O <sub>2</sub> (%) | Ar (%) | CO <sub>2</sub> (%) | CH <sub>4</sub> (%) | He (ppm) | <sup>4</sup> He/ <sup>20</sup> Ne | R <sub>M</sub> /R <sub>A</sub> | R <sub>C</sub> /R <sub>A</sub> | δ <sup>13</sup> C (‰) | CO <sub>2</sub> / <sup>3</sup> He (×10 <sup>9</sup> ) | Reference        |
|---------------------------------------|--------|--------------------|--------------------|--------|---------------------|---------------------|----------|-----------------------------------|--------------------------------|--------------------------------|-----------------------|-------------------------------------------------------|------------------|
| Bubble gas samples from South spring  |        |                    |                    |        |                     |                     |          |                                   |                                |                                |                       |                                                       |                  |
| NY17                                  | 9.2    | 7.96               | 0.35               | 0.16   | 91.1                | 0.07                | 129      | 182                               | 2.64                           | 2.64                           | -7.2                  | 1.9                                                   | This study       |
| NY18                                  | 7.7    | 8.73               | 0.55               | 0.18   | 90.5                | 0.14                | 278      | 153                               | 3.10                           | 3.10                           | -5.6                  | 0.8                                                   | This study       |
| NY1                                   | 5.1    | /                  | /                  | /      | /                   | /                   | /        | 10                                | 3.87                           | 3.95                           | -6.4                  | 0.7                                                   | Mao et al., 2009 |
| NY2                                   | 5.1    | /                  | /                  | /      | /                   | /                   | /        | 1                                 | 2.79                           | 3.24                           | -7.0                  | 10.8                                                  | Mao et al., 2009 |
| SS                                    | /      | /                  | /                  | /      | /                   | /                   | /        | 42                                | 3.54                           | 3.56                           | /                     | /                                                     | Shangguan, 2006  |
| NYQ                                   | /      | 2.13               | 0.00               | 0.07   | 97.8                | 0.00                | 8        | 55                                | 3.25                           | 3.26                           | -5.1                  | 27.0                                                  | Du et al., 1999  |
| NYQ-S                                 | 3.6    | 38.32              | 3.07               | 0.71   | 54.6                | 0.33                | 1540     | 42                                | 3.51                           | 3.53                           | /                     | 0.1                                                   | Sun, 2008        |
| Bubble gas samples from North spring  |        |                    |                    |        |                     |                     |          |                                   |                                |                                |                       |                                                       |                  |
| BY17                                  | 7.8    | 3.42               | 0.32               | 0.06   | 95.8                | 0.10                | 379      | 685                               | 2.26                           | 2.26                           | -7.3                  | 0.8                                                   | This study       |
| BY18                                  | 6.5    | 3.22               | 0.25               | 0.07   | 96.5                | 0.38                | 18       | 40                                | 3.16                           | 3.17                           | -6.0                  | 12.1                                                  | This study       |
| BY1                                   | 8.2    | 4.60               | 1.13               | 0.10   | 94.0                | 0.11                | 9        | 4                                 | 2.64                           | 2.74                           | -6.5                  | 28.5                                                  | Mao et al., 2009 |
| NS                                    | 4.7    | /                  | /                  | /      | /                   | /                   | /        | 47                                | 3.11                           | 3.13                           | -5.0                  | /                                                     | Shangguan, 2006  |
| BYQ-S                                 | 4.7    | 8.63               | 1.43               | 0.26   | 86.5                | 1.05                | 60       | 67                                | 3.09                           | 3.10                           | -5.0                  | 3.3                                                   | Sun, 2008        |
| Bubble gas samples from Hualin spring |        |                    |                    |        |                     |                     |          |                                   |                                |                                |                       |                                                       |                  |
| HL17                                  | 19.8   | 4.61               | 0.88               | 0.08   | 94.1                | 0.02                | 10       | 38                                | 2.34                           | 2.35                           | -5.0                  | 29.5                                                  | This study       |
| HL18                                  | 24.0   | 4.90               | 1.29               | 0.09   | 93.7                | 0.04                | 433      | 72                                | 2.97                           | 2.98                           | -2.6                  | 0.5                                                   | This study       |
| HS                                    | 17.0   | /                  | /                  | /      | 99.4                | 0.01                | 170      | 1860                              | 3.03                           | 3.03                           | -4.8                  | 1.4                                                   | Xu et al., 2013  |
| HL2                                   | 17.7   | 2.96               | 0.62               | 0.11   | 81.5                | 14.82               | 12       | 3                                 | 2.60                           | 2.76                           | -5.3                  | 18.8                                                  | Mao et al., 2009 |
| HL1                                   | 17.7   | 2.28               | 1.04               | 0.06   | 96.4                | 0.04                | 230      | 232                               | 3.06                           | 3.06                           | -4.5                  | 1.0                                                   | Mao et al., 2009 |
| Hualin                                | 17.6   | /                  | /                  | /      | /                   | /                   | /        | 46                                | 3.20                           | 3.22                           | -4.2                  | /                                                     | Shangguan, 2006  |
| HLQ                                   | /      | 11.98              | 2.84               | 0.16   | 85.0                | 0.00                | 150      | 103                               | 3.27                           | 3.28                           | -4.6                  | 1.2                                                   | Du et al., 1999  |
| HLFQ-S                                | 17.6   | 2.82               | 0.80               | 0.07   | 96.5                | /                   | 340      | 5                                 | 3.18                           | 3.31                           | -4.2                  | 0.6                                                   | Sun, 2008        |
| Bubble gas samples from Fanhua spring |        |                    |                    |        |                     |                     |          |                                   |                                |                                |                       |                                                       |                  |
| FH17                                  | 12.7   | 15.79              | 3.66               | 0.25   | 80.2                | 0.08                | 718      | 145                               | 2.81                           | 2.81                           | -4.3                  | 0.3                                                   | This study       |
| FH18                                  | 16.0   | 22.63              | 0.21               | 0.43   | 76.7                | 0.89                | 1845     | 359                               | 3.18                           | 3.18                           | -2.5                  | 0.1                                                   | This study       |
| FH2                                   | 5.3    | 16.76              | 0.70               | 0.40   | 82.0                | 0.14                | 35       | 157                               | 3.30                           | 3.30                           | -8.2                  | 5.1                                                   | Mao et al., 2009 |
| FH1                                   | 5.3    | /                  | /                  | /      | /                   | /                   | /        | 3                                 | 3.04                           | 3.22                           | -8.8                  | 1.5                                                   | Mao et al., 2009 |
| FHQ                                   | /      | 10.65              | 4.55               | 0.24   | 84.5                | 0.02                | 380      | 207                               | 3.26                           | 3.26                           | /                     | 0.5                                                   | Du et al., 1999  |

Gas samples from other spring clusters in WMVF

|     |      |      |      |      |      |      |     |      |      |      |      |      |                 |
|-----|------|------|------|------|------|------|-----|------|------|------|------|------|-----------------|
| SG1 | /    | 4.90 | 1.47 | 0.08 | 93.4 | 0.02 | 248 | 135  | 3.05 | 3.06 | -4.5 | 0.9  | Shangguan, 2008 |
| SG2 | /    | 7.64 | 1.08 | 0.17 | 90.2 | 0.38 | 126 | 37   | 3.03 | 3.05 | -6.6 | 1.7  | Shangguan, 2008 |
| YQ  | 3.1  | /    | /    | /    | 95.0 | 0.01 | 540 | 49   | 3.05 | 3.06 | -3.1 | 0.4  | Xu et al., 2013 |
| WBQ | 15.1 | /    | /    | /    | 99.5 | 0.04 | 4   | 6    | 1.88 | 1.92 | -5.8 | 97.6 | Xu et al., 2013 |
| DZT | /    | 2.76 | 0.53 | 0.05 | 96.6 | 0.01 | 110 | 1011 | 2.78 | 2.78 | -7.4 | 2.3  | Du et al., 1999 |

37

38

39 **Supplementary Table S4** Reference values for associated parameters of DMM, CAR, ORS and COS end-members  
40 used in C–He isotope systematics.

| End-member | $\delta^{13}\text{C}_{\text{CO}_2}$ (‰) | C contents (ppm)   | $^3\text{He}/^4\text{He}$ ( $R_A$ ) | He contents (ppm)    | $\text{CO}_2/^3\text{He}$ ( $\times 10^9$ ) |
|------------|-----------------------------------------|--------------------|-------------------------------------|----------------------|---------------------------------------------|
| DMM        | -6.5 <sup>a</sup>                       | 1920 <sup>b</sup>  | 8 <sup>a</sup>                      | 0.0288 <sup>b</sup>  | 1.5 <sup>a</sup>                            |
| CAR        | 0 <sup>c</sup>                          | 11400 <sup>d</sup> | 0.05 <sup>e</sup>                   | 0.00023 <sup>d</sup> | 1000~100000 <sup>f</sup>                    |
| ORS        | -18.5 <sup>g</sup>                      | 12618 <sup>i</sup> | 0.05 <sup>e</sup>                   | 0.0667 <sup>i</sup>  | 1000~100000 <sup>f</sup>                    |
| COS        | -11 <sup>h</sup>                        | Unknown            | 0.02 <sup>i</sup>                   | Unknown              | 0.1~100000 <sup>f</sup>                     |

41 a. Sano and Marty (1995); b. Zhang et al. (2017); c. Hoefs (2009); d. Van Soest et al. (1998); e. Andrews (1985); f.  
42 O’Nions and Oxburgh (1988); g. Cook-Kollars et al. (2014); h. Hoefs and Frey (1976); i. Lupton (1983); j. Calculated  
43 based on U–Th decay.

44 \*Helium content of the ORS end-member was calculated by on the U–Th decay of the Global subducting sediments  
45 (GLOSS) with accumulated age of 2.2 Ga (Wang et al., 2017). The contents of U and Th for the ORS end-member  
46 of GLOSS are from Plank and Langmuir (1998), Which are 2.62 ppm and 0.58 ppm, respectively (Mariana drill sites  
47 as a representative). The half-life and relatively contents of U and Th were also shown:  $T_{1/2}(^{238}\text{U}) = 4.468$  Ga,  
48 99.2739%;  $T_{1/2}(^{235}\text{U}) = 0.70381$  Ga, 0.7024%;  $T_{1/2}(^{232}\text{Th}) = 14.01$  Ga, 100%, respectively (Steiger and Jager, 1977).  
49 We assume [He] equal to [ $^4\text{He}$ ], the calculation formulas for Helium contents of the ORS end-member are presented  
50 as follows,

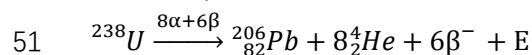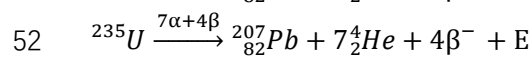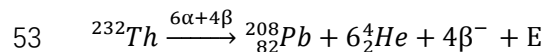

54 Helium concentrations:

$$55 \quad [\text{He}] = \left[ \frac{^{238}\text{U}}{238} \times \left( e^{\frac{t \cdot \text{Ln}2}{T_{1/2}}} - 1 \right) \times 8 + \frac{^{235}\text{U}}{235} \times \left( e^{\frac{t \cdot \text{Ln}2}{T_{1/2}}} - 1 \right) \times 7 + \frac{^{232}\text{U}}{232} \times \left( e^{\frac{t \cdot \text{Ln}2}{T_{1/2}}} - 1 \right) \times 6 \right] \times 4$$

56 Carbon concentration of ORS end-member was calculated by optimal K coefficient ( $K = 1.711$ ) of CP (Carbonated  
57 Peridotite) and ORS, where K represents the ratio of He/C values between CP and ORS end-members.

58

59

60 **Supplementary Table S5** Result of the C–He isotope systematics of the slab-mantle interactions of WMVF volatiles  
61 in the upper mantle beneath WMVF (stage 1, Figure 10).

| DMM–CAR                             | 8%    | 10%   | 13%   | 20%   | 40%    | 60%    | 80%    |
|-------------------------------------|-------|-------|-------|-------|--------|--------|--------|
| $^3\text{He}/^4\text{He}$ ( $R_A$ ) | 7.99  | 7.99  | 7.99  | 7.98  | 7.96   | 7.91   | 7.75   |
| $\delta^{13}\text{C}$ (‰)           | -4.29 | -3.92 | -3.44 | -2.62 | -1.31  | -0.66  | -0.27  |
| He content (ppm)                    | 0.027 | 0.026 | 0.025 | 0.023 | 0.017  | 0.012  | 0.006  |
| C contents (ppm)                    | 2868  | 2868  | 3152  | 3816  | 5712   | 7608   | 9504   |
| CP–ORS                              | 5%    | 10%   | 11%   | 13%   | 15%    | 20%    | 30%    |
| $^3\text{He}/^4\text{He}$ ( $R_A$ ) | 7.05  | 6.23  | 6.08  | 5.79  | 5.51   | 4.88   | 3.83   |
| $\delta^{13}\text{C}$ (‰)           | -6.66 | -8.70 | -9.05 | -9.70 | -10.29 | -11.56 | -13.45 |
| He content (ppm)                    | 0.028 | 0.030 | 0.030 | 0.031 | 0.032  | 0.034  | 0.038  |
| C contents (ppm)                    | 3356  | 3843  | 3941  | 4136  | 4331   | 4818   | 5793   |

62

63

64 **Supplementary Table S6** Result of the C–He isotope mixing between EM source and different proportions of  
65 continental crustal components (COS and CAR) of the WMVF volatiles during their ascending process (stage 2,  
66 [Figure 10](#)).

| (COS: CAR)                          | (1:0)       | (0.55:0.45) | (0.55:0.45) | (0.55:0.45) | (0.55:0.45) | (0.18:0.82) |
|-------------------------------------|-------------|-------------|-------------|-------------|-------------|-------------|
| EM: CRUST                           | 0.7:0.3     | 0.7:0.3     | 0.6:0.4     | 0.5:0.5     | 0.4:0.6     | 0.7:0.3     |
| $^3\text{He}/^4\text{He}$ ( $R_A$ ) | 2.43        | 3.29        | 2.65        | 2.10        | 1.60        | 4.62        |
| $\delta^{13}\text{C}$ (‰)           | -10.55      | -8.21       | -7.96       | -7.78       | -7.62       | -5.81       |
| He content (ppm)                    | 0.053       | 0.039       | 0.041       | 0.044       | 0.046       | 0.027       |
| C contents (ppm)                    | 8300        | 7406        | 8497        | 9587        | 10677       | 6672        |
| (COS: CAR)                          | (0.18:0.82) | (0.18:0.82) | (0.18:0.82) | (0:1)       | (0:1)       | (0:1)       |
| EM: CRUST                           | 0.6:0.4     | 0.5:0.5     | 0.4:0.6     | 0.4:0.6     | 0.2:0.8     | 0.1:0.9     |
| $^3\text{He}/^4\text{He}$ ( $R_A$ ) | 4.16        | 3.65        | 3.08        | 5.73        | 5.62        | 5.43        |
| $\delta^{13}\text{C}$ (‰)           | -5.10       | -4.53       | -4.07       | -1.89       | -0.81       | -0.38       |
| He content (ppm)                    | 0.026       | 0.025       | 0.024       | 0.013       | 0.006       | 0.003       |
| C contents (ppm)                    | 7518        | 8279        | 9209        | 8494        | 9947        | 10674       |

67

68

69 **Supplementary Table S7** Reference values for associated parameters of DMM, CAR and ORS end–members used  
70 in Nd–Mg isotope mixing calculation.

| End–member | $\delta^{26}\text{Mg}$ (‰) | MgO (%)           | $\epsilon$ Nd (t)  | Nd contents (ppm) |
|------------|----------------------------|-------------------|--------------------|-------------------|
| DMM        | -0.25 <sup>a</sup>         | 11.2 <sup>b</sup> | +8 <sup>c</sup>    | 7.3 <sup>d</sup>  |
| CAR        | -2.51 <sup>e</sup>         | 12.6 <sup>f</sup> | +4 <sup>g</sup>    | 500 <sup>g</sup>  |
| ORS*       | -0.25 <sup>h</sup>         | 3.59 <sup>i</sup> | -18.1 <sup>j</sup> | 46 <sup>j</sup>   |

71

a. [Teng et al. \(2010\)](#); b. [Langmuir et al. \(1977\)](#); c. [Zindler and Hart \(1986\)](#); d. [Sun and McDonough \(1989\)](#); e. [Wang](#)

72 et al. (2014); f. Hoernle et al. (2002); g. Bizimis et al. (2003); h. Wang et al. (2017); i. Plank and Langmuir (1998); j.  
 73 Kuritani et al. (2011).

74 \* Proterozoic sediments are assumed to represent the ORS (SIL) end-member, see details in Kuritani et al. (2011).

75

76

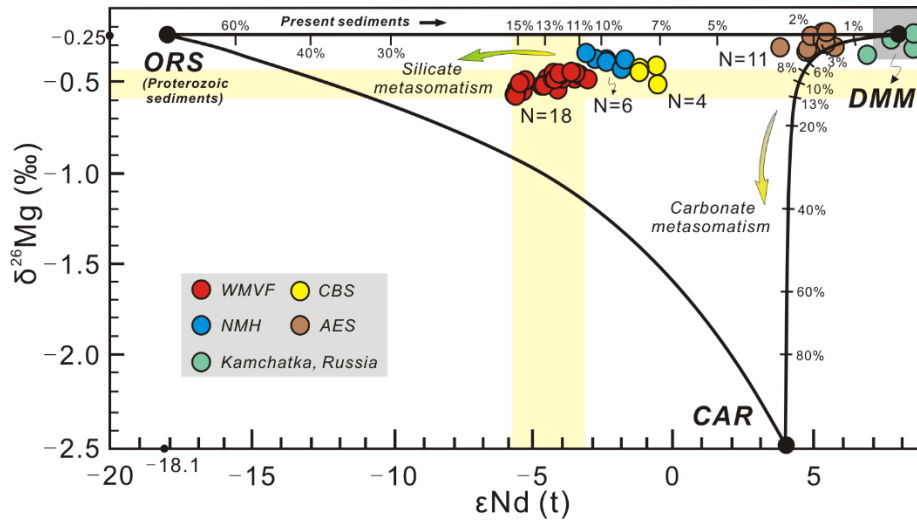

77

78 **Supplementary Figure S1** Nd–Mg isotope mixing calculation for the typical Cenozoic basalts in NE China  
 79 (Figure 1(a)). Abbreviations and references are as follows: WMVF, Wudalianchi monogenetic volcanic field;  
 80 CBS, Changbaishan volcanic field; NMH, Nuominhe volcanic field; AES, Aershan volcanic field. Nd–Mg isotope  
 81 data of these Cenozoic volcanic fields are from Li et al. (2016), Tian et al. (2016) and Wang et al. (2017).

82

83

84 **Supplementary Table S8** Result of the Nd–Mg isotope calculation of silicate (ORS) and carbonate (CAR)  
 85 metasomatism in the upper mantle beneath WMVF (Figure S1).

| Degree of silicate metasomatism (%)  | 2     | 5     | 7     | 10    | 11    | 13    | 15     | 30     | 40     | 60     |
|--------------------------------------|-------|-------|-------|-------|-------|-------|--------|--------|--------|--------|
| $\delta^{26}\text{Mg}$ (‰)           | -0.25 | -0.25 | -0.25 | -0.25 | -0.25 | -0.25 | -0.25  | -0.25  | -0.25  | -0.25  |
| $\epsilon$ Nd (t)                    | 5.03  | 1.50  | -0.40 | -2.75 | -3.43 | -4.66 | -5.74  | -11.05 | -13.08 | -15.61 |
| MgO (%)                              | 11.05 | 10.82 | 10.67 | 10.44 | 10.36 | 10.21 | 10.06  | 8.92   | 8.16   | 6.63   |
| Nd contents (ppm)                    | 8.07  | 9.24  | 10.01 | 11.17 | 11.56 | 12.33 | 13.11  | 18.91  | 22.78  | 30.52  |
| Degree of carbonate metasomatism (%) | 1     | 3     | 6     | 8     | 10    | 13    | 20     | 40     | 60     | 80     |
| $\delta^{26}\text{Mg}$ (‰)           | -0.28 | -0.33 | -0.40 | -0.45 | -0.50 | -0.58 | -0.75  | -1.21  | -1.67  | -2.09  |
| $\epsilon$ Nd (t)                    | 6.36  | 5.28  | 4.74  | 4.58  | 4.46  | 4.36  | 4.22   | 4.09   | 4.04   | 4.01   |
| MgO (%)                              | 11.21 | 11.24 | 11.28 | 11.31 | 11.34 | 11.38 | 11.48  | 11.76  | 12.04  | 12.32  |
| Nd contents (ppm)                    | 12.23 | 22.08 | 36.86 | 46.72 | 56.57 | 71.35 | 105.84 | 204.38 | 302.92 | 401.46 |

86

87

88



89 **Reference:**

90

91 Andrews JN (1985) The isotopic composition of radiogenic helium and its use to study groundwater movement in confined aquifers.  
92 *Chemical Geology*, 49, 339–351.

93 Bizimis M, Salters VJM, Dawson JB (2003) The brevity of carbonatite sources in the mantle: evidence from Hf isotopes. *Contributions*  
94 *to Mineralogy and Petrology*, 145, 281–300.

95 Carapezza ML, Federico C (2000) The contribution of fluid geochemistry to the volcano monitoring of Stromboli. *Journal of*  
96 *Volcanology and Geothermal Research*, 95, 227–245.

97 Cook–Kollars J, Bebout GE, Collins NC, Angiboust S, Agard P (2014) Subduction zone metamorphic pathway for deep carbon cycling:  
98 Evidence from HP/UHP metasedimentary rocks, Italian Alps. *Chemical Geology*, 386, 31–48.

99 Di Martino RMR, Capasso G, Camarda M (2016) Spatial domain analysis of carbon dioxide from soils on Vulcano Island: Implications  
100 for CO<sub>2</sub> output evaluation. *Chemical Geology*, 444, 59–70.

101 Plank T, Langmuir CH (1998) The chemical composition of subducting sediment and its consequences for the crust and mantle. *Chemical*  
102 *Geology*, 145(3), 325–394.

103 Hernández PA, Pérez NM, Fridriksson T, Egbert J, Ilyinskaya E, Thárhallsson A, Ívarsson G, Gíslason G, Gunnarsson I, Jónsson B,  
104 Padrón E, Melián G, Mori T, Notsu K (2012) Diffuse volcanic degassing and thermal energy release from Hengill volcanic system,  
105 Iceland. *Bulletin of Volcanology*, 74, 2435–2448.

106 Hernández PA, Notsu K, Tsurumi M, Mori T, Ohno M, Shimoike Y, Salazar J, Pérez NM (2003) Carbon dioxide emissions from soils at  
107 Hakkoda, north Japan. *Journal of Geophysical Research*, 108, 2210.

108 Hoefs J (2009) Stable Isotope Geochemistry. Springer–Verlag, Berlin, Heidelberg.

109 Hoernle K, Tilton G, Le Bas M, Duggen S GarbeSchonberg D (2002) Geochemistry of oceanic carbonatites compared with continental  
110 carbonatites: mantle recycling of oceanic crustal carbonate. *Contributions to Mineralogy and Petrology*, 142, 520–542.

111 Kuritani T, Ohtani E, Kimura JI (2011) Intensive hydration of the mantle transition zone beneath China caused by ancient slab stagnation.  
112 *Nature Geoscience*, 4(10), 713–716.

113 O'Nions RK, Oxburgh ER (1988) Helium, volatile fluxes and the development of continental crust. *Earth and Planetary Science Letters*,  
114 90, 331–347.

115 Sano Y, Marty B (1995) Origin of carbon in fumarolic gas from island arcs. *Chemical Geology*, 119, 265–274.

116 Steiger RH, Jager E (1977) Subcommittee on geochronology: convention on the use of decay constants in geo- and cosmochronology.  
117 *Earth and Planetary Science Letters*, 36(3), 359–362.

118 Teng FZ, Li WY, Ke S, Marty B, Dauphas N, Huang S, Wu FY, Pourmand A (2010) Magnesium isotopic composition of the Earth and  
119 chondrites. *Geochimica et Cosmochimica Acta*, 74, 4150–4166.

120 Tian HC, Yang W, Li SG, Ke S, Chu ZY (2016) Origin of low  $\delta^{26}\text{Mg}$  basalts with EM–I component: Evidence for interaction between  
121 enriched lithosphere and carbonated asthenosphere. *Geochimica et Cosmochimica Acta*, 188, 93–105.

122 Langmuir CH, Bender JF, Bence AE, Hanson GN, Taylor SR (1977) Petrogenesis of basalts from the FAMOUS area: Mid–Atlantic  
123 Ridge. *Earth and Planetary Science Letters*, 36(1), 133–156.

124 Li SG, Yang W, Ke S, Meng XN, Tian HC, Xu LJ, He YS, Huang J, Wang XC, Xia QC, Sun WD, Yang XY, Ren ZY, Wei HQ, Liu YS,  
125 Meng FC, Yan J (2016) Deep carbon cycles constrained by a large–scale mantle Mg isotope anomaly in eastern China. *National*  
126 *Science Review*, 4(1), 111–120.

127 Notsu K, Sugiyama K, Hosoe M, Uemura A, Shimoike Y, Tsunomori F, Sumino H, Yamamoto J, Mori T, Hernández PA (2005) Diffuse  
128 CO<sub>2</sub> efflux from Iwojima volcano, Izu–Ogasawara arc, Japan. *Journal of Volcanology and Geothermal Research*, 139, 147–161.

129 Sun SS, McDonough WF (1989) Chemical and isotopic systematics of oceanic basalts: implications for mantle composition and  
130 processes. In: Saunders AD, Norry MJ (ed.), *Magmatism in the Ocean Basins*, Geological Society, Special Publications, London, 42,  
131 313–345.

132 Van Soest MC, Hilton DR, Kreulen R (1998) Tracing crustal and slab contributions to arc magmatism in the Lesser Antilles island arc

133 using helium and carbon relationships in geothermal fluids. *Geochimica et Cosmochimica Acta*, 62, 3323–3335.

134 Wang XJ, Chen LH, Hofmann AW, Mao FG, Liu JQ, Zhong Y, Xie LW, Yang YH (2017) Mantle transition zone–derived EM1 component  
135 beneath NE China: Geochemical evidence from Cenozoic potassic basalts. *Earth and Planetary Science Letters*, 465, 16–28.

136 Wang SJ, Teng FZ, Li SG (2014) Tracing carbonate–silicate interaction during subduction using magnesium and oxygen isotopes. *Nature*  
137 *Communications*, 5(1), 5328.

138 Wang XJ, Chen LH, Hofmann AW, Mao FG, Liu JQ, Zhong Y, Xie LW, Yang YH (2017) Mantle transition zone–derived EM1 component  
139 beneath NE China: Geochemical evidence from Cenozoic potassic basalts. *Earth and Planetary Science Letters*, 465, 16–28.

140 Werner C, Hurwitz S, Evans W C, Lowenstern J B, Bergfeld D, Heasler H, Jaworowski C, Hunt A (2008) Volatile emissions and gas  
141 geochemistry of Hot Spring Basin, Yellowstone National Park, USA. *Journal of Volcanology and Geothermal Research*, 178(4),  
142 751–762.

143 Zhang LH, Guo ZF, Sano Y, Zhang ML, Sun YT, Cheng ZH, Yang TF (2017) Flux and genesis of CO<sub>2</sub> degassing from volcanic–  
144 geothermal fields of Gulu–Yadong rift in the Lhasa terrane, South Tibet: Constraints on characteristics of deep carbon cycle in the  
145 India–Asia continent subduction zone. *Journal of Asian Earth Sciences*, 149, 110–123.

146 Zhang ML, Guo ZF, Sano Y, Cheng ZH, Zhang LH (2015) Stagnant subducted Pacific slab–derived CO<sub>2</sub> emissions: Insights into magma  
147 degassing at Changbaishan volcano, NE China. *Journal of Asian Earth Sciences*, 106, 49–63.

148 Zhang ML, Guo ZF, Sano Y, Zhang LH, Sun YT, Cheng ZH, Yang TF (2016) Magma–derived CO<sub>2</sub> emissions in the Tengchong volcanic  
149 field, SE Tibet: Implications for deep carbon cycle at intra–continent subduction zone. *Journal of Asian Earth Sciences*, 127, 76–90.

150 Zindler A, Hart S (1986) Chemical geodynamics. *Annual Review of Earth and Planetary Science*, 14, 493–571.
